# Supplementary material for: Health Service Interventions for Intimate Partner Violence among Military Personnel and Veterans: A Framework and Scoping Review
Source: Int J Environ Res Public Health. 2022 Mar 17;19(6):3551. doi: 10.3390/ijerph19063551 (PMC8955703; doi:10.3390/ijerph19063551)
Supplement: Supplementary file 1 [file ijerph-19-03551-s001.zip › Supplementary Table S1.pdf]

Supplementary Table S1

*Example Search Strategy Conducted in PsycINFO Database*

| Step | Search Terms                                                                                                                                                                                                                                                          | No of Records |
|------|-----------------------------------------------------------------------------------------------------------------------------------------------------------------------------------------------------------------------------------------------------------------------|---------------|
| S1   | battered females/ or domestic violence/ or intimate partner violence/                                                                                                                                                                                                 | 21513         |
| S2   | (IPV OR "intimate partner violence" OR "partner violence" OR "spousal violence" OR "domestic violence" OR "intimate partner abuse" OR "partner abuse" OR "spouse abuse" OR "intimate partner victim*" OR "intimate partner perpetrat*" OR "family violence")ab,mh,ti. | 22811         |
| S3   | ((Abus* OR batter* OR violen* OR beat* or assault*) adj3 (perpetrat* OR victim* OR domestic OR partner* OR famil* OR spous* OR wom*n OR m*n OR wife OR wives OR husband* OR gender)).ab,ti.                                                                           | 48376         |
| S4   | S1 or S2 or S3                                                                                                                                                                                                                                                        | 51509         |
| S5   | military personnel/ or air force personnel/ or army personnel/ or coast guard personnel/ or marine personnel/ or military veterans/ or national guard personnel/ or navy personnel/                                                                                   | 28344         |
| S6   | ("ex-military" OR veteran* OR military OR "active duty" OR "military personnel" OR army OR navy OR marines OR "air force" OR "armed forces" OR "military service personnel" OR "soldier").ab,mh,ti.                                                                   | 52459         |
| S7   | S5 or S6                                                                                                                                                                                                                                                              | 55355         |
| S8   | epidemiology/ or population/                                                                                                                                                                                                                                          | 53347         |
| S9   | prevalence.mp.                                                                                                                                                                                                                                                        | 125613        |
| S10  | (prevalence OR prevalent OR occurrence OR incidence OR epidemiol* OR population OR representative).ab,mh,ti.                                                                                                                                                          | 506520        |
| S11  | (random* NEAR/3 (select* or sampl*)).ab,ti.                                                                                                                                                                                                                           | 36502         |
| S12  | S8 or S9 or S10 or S11                                                                                                                                                                                                                                                | 538246        |
| S13  | Exp mental health services/                                                                                                                                                                                                                                           | 41545         |
| S14  | treatment/ or intervention/ or prevention/                                                                                                                                                                                                                            | 159289        |
| S15  | ("Health*care setting*" or "Health*care service*" or "Health*care system*" or "Health*care centre*" or "Health setting*" or "Health service*" or "Health system" or "Health centre*" or "clinical setting" or "clinical service").ab,mh,ti.                           | 89725         |

|     |                                                                                                                                                                          |         |
|-----|--------------------------------------------------------------------------------------------------------------------------------------------------------------------------|---------|
| S16 | (Implement* or Treat* or program* or Intervene* or Prevent* or Assess* or Screen* or "Veterans Health Administration" or VHA or Patient or provider or Clinic).ab,mh,ti. | 1978471 |
| S17 | S13 or S14 or S15 or S16                                                                                                                                                 | 2016433 |
| S18 | S12 or S17                                                                                                                                                               | 2234432 |
| S19 | S4 and S7 and S18                                                                                                                                                        | 799     |
| S20 | limited S19 to (peer reviewed journal and english language)                                                                                                              | 554     |

---

*Note.* ab = abstract, mh = mesh headings, ti = title.
