# Supplementary material for: Health Service Interventions for Intimate Partner Violence among Military Personnel and Veterans: A Framework and Scoping Review
Source: Int J Environ Res Public Health. 2022 Mar 17;19(6):3551. doi: 10.3390/ijerph19063551 (PMC8955703; doi:10.3390/ijerph19063551)
Supplement: Supplementary file 1 [file ijerph-19-03551-s001.zip › Supplementary Table S2 R1.pdf]

Supplementary Table S2. Characteristics of included studies (n = 19)

| Authors                  | Year | Country | Sample                                                                                 | Intervention Target | Intervention Type                                                                                                    | Study Design               |
|--------------------------|------|---------|----------------------------------------------------------------------------------------|---------------------|----------------------------------------------------------------------------------------------------------------------|----------------------------|
| Chaffin and Richter [21] | 2002 | U.S.    | <i>n</i> = 254 dental practitioners                                                    | IPV Victimization   | Training program (1 hour) for service providers; 'Prevention of Abuse and Neglect through Dental Awareness' (PANDA). | Pre/Post                   |
| Chermack et al. [18]     | 2019 | U.S.    | <i>n</i> = 180 veterans (92% men)                                                      | IPV Perpetration    | Integrative / eclectic program; Motivational Interviewing , CBT, and telephone monitoring (Continuing Care).         | RCT                        |
| Creech et al. [32]       | 2018 | U.S.    | <i>n</i> = 51 veterans (all men)                                                       | IPV Perpetration    | Group CBT program; Strength at Home-Men (SAH-M)                                                                      | Pre/Post                   |
| Creech et al. [29]       | 2020 | U.S.    | <i>n</i> = 20 veterans (all women), including <i>n</i> = 9 reporting IPV victimisation | IPV Victimization   | Brief psychosocial program; Safe and Healthy Experiences (SHE) intervention                                          | Open trial                 |
| Danitz et al. [30]       | 2019 | U.S.    | <i>n</i> = 23 service providers                                                        | IPV Victimization   | Extended psychosocial program; Recovering from IPV through Strength and Empowerment (RISE)                           | Qualitative                |
| Edwardsen et al. [22]    | 2011 | U.S.    | <i>n</i> = 73 service providers                                                        | IPV Victimization   | Training program (7-hour) for service providers                                                                      | Pre/Post                   |
| Iverson et al. [23]      | 2013 | U.S.    | <i>n</i> = 160 veterans (all women)                                                    | IPV Victimization   | Case identification strategy; Hurt/Insult/Threaten/Scream (HITS) screening tool                                      | Cross-sectional            |
| Iverson et al. [25]      | 2015 | U.S.    | <i>n</i> = 80 veterans (all women)                                                     | IPV Victimization   | Case identification strategy; Extended HITS (E-HITS) screening tool                                                  | Cross-sectional            |
| Iverson et al. [28]      | 2018 | U.S.    | <i>n</i> = 774 veterans (all women)                                                    | IPV Victimization   | Case identification strategy; 3-item Danger Assessment secondary risk screening tool                                 | Retrospective chart review |
| Iverson et al. [26]      | 2020 | U.S.    | NA                                                                                     | IPV Victimization   | Case identification strategy; Screening tools and supporting toolkit                                                 | Protocol for RCT           |

| Authors              | Year   | Country | Sample                                                                             | Intervention Target              | Intervention Type                                                         | Study Design                                                 |
|----------------------|--------|---------|------------------------------------------------------------------------------------|----------------------------------|---------------------------------------------------------------------------|--------------------------------------------------------------|
| Latta et al. [24]    | 2016   | U.S.    | <i>n</i> = 93 patients attending a VA women's health clinic                        | IPV Victimization                | Case identification strategy; HITS screening tool                         | Cross-sectional                                              |
| Love et al. [31]     | 2015   | U.S.    | <i>n</i> = 6 veterans (all men), and <i>n</i> = 20 mental health service providers | IPV Perpetration                 | Group CBT program; SAH-M                                                  | Pre/Post (veterans), and cross-sectional (service providers) |
| McIntyre et al. [27] | 1999   | U.S.    | <i>n</i> = 127 patients attending a VA women's health centre                       | IPV Victimization                | Case identification strategy; Trauma Questionnaire (TQ)                   | Cross-sectional                                              |
| Schaffer [19]        | 2010   | U.S.    | <i>n</i> = 76 veterans (all men)                                                   | IPV Perpetration                 | Integrative / eclectic program; Group Batterer Intervention Program (BIP) | Pre/Post                                                     |
| Schaffer [20]        | 2016   | U.S.    | <i>n</i> = 131 veterans (all men)                                                  | IPV Perpetration                 | Integrative / eclectic program; Group BIP                                 | Pre/Post                                                     |
| Taft et al. [16]     | 2013   | U.S.    | <i>n</i> = 6 veterans (all men)                                                    | IPV Perpetration                 | Group CBT program; SAH-M                                                  | Pre/Post                                                     |
| Taft et al. [14]     | 2014   | U.S.    | <i>n</i> = 9 veterans (all men) and intimate partners (all women)                  | IPV Perpetration / Victimization | Couples program; Strength at Home – Couples (SAH-C)                       | Pre/Post                                                     |
| Taft et al. [17]     | 2016 a | U.S.    | <i>n</i> = 135 veterans/service members (all men)                                  | IPV Perpetration                 | Group CBT program; SAH-M                                                  | RCT                                                          |
| Taft et al. [15]     | 2016 b | U.S.    | <i>n</i> = 69 veterans (all men) and intimate partners (all women)                 | IPV Perpetration / Victimization | Couples program; SAH-C                                                    | RCT                                                          |

Note. CBT = Cognitive-behavioral therapy; IPV = Intimate Partner Violence; RCT = Randomised control trial; U.S. = United States.
