# Supplementary material for: Health Service Interventions for Intimate Partner Violence among Military Personnel and Veterans: A Framework and Scoping Review
Source: Int J Environ Res Public Health. 2022 Mar 17;19(6):3551. doi: 10.3390/ijerph19063551 (PMC8955703; doi:10.3390/ijerph19063551)
Supplement: Supplementary file 1 [file ijerph-19-03551-s001.zip › Supplementary Table S3 R1.pdf]

Supplementary Table S3. Summary of study characteristics for randomised trials

| Study                         | Intervention | Sample                                                                                | Eligibility                                                                                                                                                                                                                                                                                                                                                                                                                                                                     | Design                                                                                                                                                                                                                                                                                                                                                                        | Key Findings                                                                                                                                                                                                                                                                                                                                                                                               | Major Caveats                                                                                                                                                                                                                                                                                                                                        |
|-------------------------------|--------------|---------------------------------------------------------------------------------------|---------------------------------------------------------------------------------------------------------------------------------------------------------------------------------------------------------------------------------------------------------------------------------------------------------------------------------------------------------------------------------------------------------------------------------------------------------------------------------|-------------------------------------------------------------------------------------------------------------------------------------------------------------------------------------------------------------------------------------------------------------------------------------------------------------------------------------------------------------------------------|------------------------------------------------------------------------------------------------------------------------------------------------------------------------------------------------------------------------------------------------------------------------------------------------------------------------------------------------------------------------------------------------------------|------------------------------------------------------------------------------------------------------------------------------------------------------------------------------------------------------------------------------------------------------------------------------------------------------------------------------------------------------|
| Taft et al.<br>(2016)<br>[15] | SAH-C        | n = 69 couples<br>(male veterans or<br>AD personnel and<br>partners) from the<br>U.S. | Couples eligible if one or both partners<br>reported: (a) significant relationship<br>distress according to self-report scales;<br>or (b) high psychological IPV<br>perpetrated by men according to<br>standardised self-report scales.<br><br>Couples were excluded if: female<br>partners reported recent use of violence<br>that involved weapons or produced<br>injuries or partner reports of fear;<br>and/or male partners reported physical<br>IPV in the past 6 months. | Couples randomly allocated to<br>SAH-C or a SP condition involving<br>minimal therapist intervention.<br><br>Outcome measures included<br>Physical and Psychological IPV<br>subscales of CTS-2, and the<br>MMEA.<br><br>Measures administered at: pre-<br>intervention; immediate post-<br>intervention; 6-months post-<br>intervention; and 12-months post-<br>intervention. | Participants in SAH-C were<br>around twice as likely to complete<br>the intervention, when compared<br>to SP.<br><br>Veterans and partners in SAH-C<br>tended to report lower physical and<br>psychological IPV perpetration<br>when compared to SP, with effect<br>sizes ranging from small to<br>moderate. However, with only one<br>exception these differences were<br>not significant ( $p < 0.05$ ). | (1) Most comparisons<br>between SAH-C and the<br>control condition were not<br>significant and findings are<br>equivocal.<br><br>(2) Small sample size for a<br>prevention study (which<br>typically require large<br>numbers to detect modest<br>effects), and the lack of<br>significant effects may be<br>attributed to low statistical<br>power. |

|                                   |                      |                                                                                                                    |                                                                                                                                                                                                                                                                                                                                                                           |                                                                                                                                                                                                                                                                                                                                                                                                                                                                                                            |                                                                                                                                                                                                                                                                                                                                                                                                                                                                                      |                                                                                                                                                                                                                                                                                                                            |
|-----------------------------------|----------------------|--------------------------------------------------------------------------------------------------------------------|---------------------------------------------------------------------------------------------------------------------------------------------------------------------------------------------------------------------------------------------------------------------------------------------------------------------------------------------------------------------------|------------------------------------------------------------------------------------------------------------------------------------------------------------------------------------------------------------------------------------------------------------------------------------------------------------------------------------------------------------------------------------------------------------------------------------------------------------------------------------------------------------|--------------------------------------------------------------------------------------------------------------------------------------------------------------------------------------------------------------------------------------------------------------------------------------------------------------------------------------------------------------------------------------------------------------------------------------------------------------------------------------|----------------------------------------------------------------------------------------------------------------------------------------------------------------------------------------------------------------------------------------------------------------------------------------------------------------------------|
| Taft et al.<br>(2016)<br>[17]     | SAH-M                | <i>n</i> = 135 male veterans or AD personnel from U.S, and <i>n</i> = 111 female partners (collateral informants). | Male veterans or AD personnel eligible if: (a) they provided partner contact consent; and (b) there were self-reports, collateral-reports, or court-reports of any male-to-female physical IPV over the previous 6-months, or severe physical IPV over the past 12-months, or an ongoing legal problem related to IPV.                                                    | Couples randomly allocated to SAH-M or an ETAU condition involving referrals to services inside and outside the VHA, continued assessment for IPV, and a check-in call between assessments.<br><br>Outcome measures included Physical and Psychological IPV subscales of the CTS-2, and MMEA. Measures administered at: pre-intervention; immediately post SAH-M (3 months after baseline for ETAU); and 3-months post SAM-M (6-months after baseline for ETAU).                                           | SAH-M associated with significantly ( $p < 0.05$ ) greater declines overall in scores on the Physical IPV and Psychological IPV subscales of the CTS-2, and Restrictive Engulfment subscale of the MMEA (but not other subscales), when compared to ETAU.<br><br>Follow-up analyses indicated significantly lower scores on the CTS-2 subscales in the SAH-M condition at post-treatment, although effects were reduced and were not significant at 3-month follow-up.               | (1) More than 50% of participants in SAH-M were classified as non-completers.<br><br>(2) The sample included a small number of participants ( <i>n</i> = 9) that did not self-report any physical IPV, but were included on the basis of court involvement or collateral reports of IPV.                                   |
| Chermack et al.<br>(2019)<br>[18] | MI-CBT and MI-CBT+CC | <i>n</i> = 180 veterans (92% male) seeking substance use and/or mental health treatment from VHA.                  | Veterans seeking substance use and/or mental health treatment were eligible if they reported past-year: (a) substance use; and (b) physical aggression directed to partners or non-partners. The latter as operationalised by physical IPV and injury subscales from the CTS-2, and a modified version of the CTS-2 that was adapted to reference non-partner aggression. | Participants randomly allocated one of two active interventions (MI-CBT or MI-CBT+CC) or Enhanced Treatment as Usual (ETAU). The latter involved participation in standard VHA substance use and/or mental health treatment programs, along with a single session of brief advice to avoid aggression and review of referral information.<br><br>Outcome measures included a structured interview (using a calendar approach) based on CTS-2 Physical IPV and Injury subscales, and a Timeline Follow-Back | All conditions demonstrated significant decreases in Physical IPV over time, and there were low levels of violence disclosed across all groups and follow-up periods (10.9% of all participants reported Physical IPV towards partners and 2.9% reported Partner Injury over the entire 12-month post-intervention period).<br><br>In the context of limited variability, there was a significantly greater decreases in Physical IPV towards partners in the MI-CBT + CC condition, | (1) Measures of IPV were based entirely on participant disclosures and there were no collateral (e.g., partner) reports of violence.<br><br>(2) There low levels of IPV disclosed across all conditions and follow-up periods, and thus limited variability which could limit the ability to detect between-group effects. |

|                                   |                                 |                             |
|-----------------------------------|---------------------------------|-----------------------------|
| measure for alcohol and drug use. | relative to ETAU. However, no   | (3) Interventions were      |
| Measures were administered at     | other significant between-group | focussed on IPV and non-    |
| baseline and 3-months, 6-months,  | differences were observed.      | partner aggression, and not |
| and 12-months post-intervention.  |                                 | all participants reported   |
|                                   |                                 | violence directed towards   |
|                                   |                                 | partners.                   |

---

*Notes.* AD = Active duty; CTS-2 = Conflict Tactic Scale – 2; ETAU = Enhanced Treatment as Usual; IPV = Intimate partner violence; MI-CBT = Motivational Interviewing – Cognitive Behavioural Treatment; MI-CBT+CC = Motivational Interviewing – Cognitive Behavioural Treatment plus Continuing Care; MMEA = Multidimensional Measure of Emotional Abuse; SAH-C = Strength at Home – Couples; SAH-M = Strength at Home – Men; SP = Supportive Prevention; U.S.= United States; VHA = Veteran Health Administration.
